# Supplementary material
Source: bioRxiv or medRxiv preprint supplement (https://medrxiv.org/highwire/filestream/84597/field_highwire_adjunct_files/0/2020.06.04.20121863-1.pdf)
Supplement: Supplementary file [file 2020.06.04.20121863-1.pdf]

# Supplementary Materials

## COVID-19 and climate: global evidence from 117 countries

**Authors:** Simiao Chen<sup>1,2,†</sup>, Klaus Prettnner<sup>3,†</sup>, Michael Kuhn<sup>4</sup>, Pascal Geldsetzer<sup>1,5</sup>, Chen Wang<sup>2,6,7,8,\*</sup>, Till Bärnighausen<sup>1,2,9,10,\*‡</sup>, David E. Bloom<sup>10,#,‡</sup>

### Affiliations:

<sup>1</sup> Heidelberg Institute of Global Health, Heidelberg University Medical School, Heidelberg University, Heidelberg, Germany.

<sup>2</sup> Chinese Academy of Medical Sciences & Peking Union Medical College, Beijing, China.

<sup>3</sup> University of Hohenheim, Institute of Economics, Stuttgart, Germany.

<sup>4</sup> Wittgenstein Centre (IIASA, VID/ÖAW, WU), Vienna Institute of Demography, Vienna, Austria.

<sup>5</sup> Division of Primary Care and Population Health, Department of Medicine, Stanford University, Stanford, CA, USA.

<sup>6</sup> National Clinical Research Center for Respiratory Diseases, Beijing, China.

<sup>7</sup> Department of Pulmonary and Critical Care Medicine, Center of Respiratory Medicine, China–Japan Friendship Hospital, Beijing, China.

<sup>8</sup> Chinese Academy of Engineering, Beijing, China.

<sup>9</sup> Africa Health Research Institute (AHRI), Somkhele, KwaZulu-Natal, South Africa

<sup>10</sup> Department of Global Health and Population, Harvard T.H. Chan School of Public Health, Boston, MA, USA.

† Co-first authors: SC and KP contributed equally to this study

‡ Co-senior authors: TB and DB

\* Co-corresponding authors:

TB: [till.baernighausen@uni-heidelberg.de](mailto:till.baernighausen@uni-heidelberg.de)

CW: [wangchen@pumc.edu.cn](mailto:wangchen@pumc.edu.cn)

Testing for nonlinear relationships: We test on the presence of a nonlinear relationship between the number of confirmed cases per million inhabitants and latitude. The coefficients of the added quadratic terms are insignificant at the 5% significance level, indicating that higher order polynomials are not adding value to our estimation.

5

**Table S1.** Results from OLS regressions of the number of COVID-19 cases per million inhabitants in a country on the country's latitude, quadratic terms of the latitude, and control variables.

|                       | Cases per million inhabitants           |                                             |                                              |                                              |                                              |
|-----------------------|-----------------------------------------|---------------------------------------------|----------------------------------------------|----------------------------------------------|----------------------------------------------|
|                       | (1)<br>Coefficient<br>95% CI<br>p value | (2)<br>Coefficient<br>95% CI<br>p value     | (3)<br>Coefficient<br>95% CI<br>p value      | (4)<br>Coefficient<br>95% CI<br>p value      | (5)<br>Coefficient<br>95% CI<br>p value      |
| Latitude              | 0.016<br>(-0.053 to 0.086)              | 0.039<br>(-0.029 to 0.106)                  | 0.011<br>(-0.043 to 0.066)                   | 0.014<br>(-0.042 to 0.069)                   | 0.007<br>(-0.040 to 0.054)                   |
| Latitude_squared      | 0.644<br>(-0.0002 to 0.002)             | 0.259<br>(-0.001 to 0.001)                  | 0.684<br>(-0.0004 to 0.001)                  | 0.624<br>(-0.001 to 0.001)                   | 0.770<br>(-0.0004 to 0.001)                  |
| Air travel            | 0.117                                   | 0.413<br>(0.012 to 0.217)                   | 0.355<br>(0.021 to 0.108)                    | 0.491<br>(0.022 to 0.118)                    | 0.369<br>(-0.019 to 0.079)                   |
| Distance to Wuhan     |                                         | 0.114<br>0.030<br>0.074<br>(0.003 to 0.146) | 0.064<br>0.004<br>0.030<br>(-0.033 to 0.093) | 0.070<br>0.004<br>0.011<br>(-0.054 to 0.076) | 0.030<br>0.227<br>0.049<br>(-0.013 to 0.111) |
| Vehicle concentration |                                         | 0.042                                       | 0.348<br>2.386<br>(1.438 to 3.334)           | 0.740<br>2.366<br>(1.419 to 3.312)           | 0.119<br>0.993<br>(-0.130 to 2.116)          |
| Urbanization          |                                         |                                             | <0.001<br>0.026<br>(0.013 to 0.039)          | <0.001<br>0.022<br>(0.009 to 0.035)          | 0.082<br>-0.002<br>(-0.019 to 0.015)         |
| Testing intensity     |                                         |                                             | <0.001                                       | 0.001<br>-0.006<br>(-0.010 to -0.002)        | 0.810<br>-0.005<br>(-0.010 to -0.001)        |
| Cell phone usage      |                                         |                                             |                                              | 0.011<br>0.004<br>(-0.005 to 0.013)          | 0.011<br>-0.003<br>(-0.012 to 0.006)         |
| Income                |                                         |                                             |                                              | 0.377                                        | 0.505<br>1.052<br>(0.595 to 1.510)           |
| Constant              | 3.331<br>(2.329 to 4.332)               | 2.298<br>(0.976 to 3.619)                   | 0.958<br>(-0.035 to 1.952)                   | 1.171<br>(-0.209 to 2.551)                   | -6.207<br>(-9.681 to -2.732)                 |
| P value               | <0.001                                  | 0.001                                       | 0.059                                        | 0.095                                        | 0.001                                        |
| R <sup>2</sup>        | 0.362                                   | 0.444                                       | 0.653                                        | 0.685                                        | 0.745                                        |
| Adj. R <sup>2</sup>   | 0.351                                   | 0.425                                       | 0.634                                        | 0.662                                        | 0.723                                        |
| N                     | 117                                     | 117                                         | 117                                          | 117                                          | 117                                          |

Column 1 contains the bivariate specification of the regression of cases per million inhabitants on latitude. The other columns add control variables one by one. The results in this table refer to countries in which more than 100 cases were reported as of April 10, 2020.

“Latitude” is the absolute latitude of a country in degrees, “Latitude\_squared” is the squared of the absolute latitude of a country in degrees, “air travel” refers to the number of air passengers per capita in a country, “distance to Wuhan” measures the distance of the capital city of a country to Wuhan in thousand kilometers, “vehicle concentration” is the number of registered vehicles per capita, “urbanization” is the percent of the population living in cities, “testing intensity” is the number of tests per confirmed case, “cell phone usage” refers to the number of cell phones per capita, and “income” refers to the purchasing-power adjusted per-capita gross domestic product in a country. Robust standard errors are used to account for heteroscedasticity.

## Robustness test

We also perform robustness test by using robust estimation based on the mm-estimator that is less sensitive to outliers. The coefficient estimate for latitude is slightly higher than in case of the OLS regressions in Table 1, and the parameter estimate of latitude remain significant.

5 **Table S2.** Results from robust regressions based on the mm-estimator of the number of COVID-19 cases per million inhabitants in a country on the country’s latitude and control variables.

|                       | Cases per million inhabitants          |
|-----------------------|----------------------------------------|
|                       | Coefficient<br>95% CI<br>p value       |
| Latitude              | 0.029<br>(0.013 to 0.044)<br><0.001    |
| Air travel            | -0.005<br>(-0.054 to 0.044)<br>0.835   |
| Distance to Wuhan     | 0.052<br>(-0.043 to 0.148)<br>-0.283   |
| Vehicle concentration | -0.431<br>(-1.536 to 0.673)<br>0.444   |
| Urbanization          | 0.009<br>(-0.013 to 0.031)<br>0.433    |
| Testing intensity     | -0.027<br>(-0.037 to -0.018)<br><0.001 |
| Cell phone usage      | 0.001<br>(-0.009 to 0.011)<br>0.831    |
| Income                | 1.754<br>(1.188 to 2.319)<br><0.001    |
| Constant              | -13.703<br>(-18.054 to -9.353)         |
| P value               | <0.001                                 |
| R <sup>2</sup>        | 0.829                                  |
| N                     | 65                                     |

Column 1 contains the bivariate specification of the regression of cases per million inhabitants on latitude. The other columns add control variables one by one. The results in this table refer to countries in which more than 100 cases were reported as of April 10, 2020.

10 “Latitude” is the absolute latitude of a country in degrees, “air travel” refers to the number of air passengers per capita in a country, “distance to Wuhan” measures the distance of the capital city of a country to Wuhan in thousand kilometers, “vehicle concentration” is the number of registered vehicles per capita, “urbanization” is the percent of the population living in cities, “testing intensity” is the number of tests per confirmed case, “cell phone usage” refers to the number of cell phones per capita, and “income” refers to the purchasing-power adjusted per-capita gross domestic product in a country.

15
